# Supplementary material for: Modeling early stage atherosclerosis in a primary human vascular microphysiological system
Source: PubMed Central journal article supplement (PMC7591486; doi:10.1038/s41467-020-19197-8), 2020-10-27
Supplement: 41467_2020_19197_MOESM3_ESM.pdf [file 41467_2020_19197_MOESM3_ESM.pdf]

## **Description of Additional Supplementary Files**

File Name: Supplementary Movie 1

Description: The video shows that the collagen TEBV does not permit fluid extravasation as shown by perfusion of a dye through the lumen.
